# Supplementary material for: Characterisation of a Spontaneous Mutant of Lemna gibba G3 (Lemnaceae)
Source: MDPI journal article supplement (doi:10.3390/plants12132525), 2023-07-02
Supplement: s1 [file s1]

**Supplement Table S2:** Nutrient media N (Appenroth, K.J. et al., 1996, DOI10.1007/BF02879642) and Hutner's medium (Hutner S.H., 1953: Comparative physiology of heterotrophic growth. In: LOOMIS W.E. (ed.), Growth and differentiation in plants. Iowa State, College Press, 417-446)

|                    | N medium                                             |                     |                                          | Half-strength Hutner |                                          |
|--------------------|------------------------------------------------------|---------------------|------------------------------------------|----------------------|------------------------------------------|
| Salt               | Formula                                              | Molar concentration | Mass Concentration (mg L <sup>-1</sup> ) | Molar concentration  | Mass Concentration (mg L <sup>-1</sup> ) |
| Ammonium nitrate   | NH <sub>4</sub> NO <sub>3</sub>                      | -                   | -                                        | 1 mM                 | 80                                       |
| Boric acid         | H <sub>3</sub> BO <sub>3</sub>                       | 5 µM                | 0.309                                    | 0.121 mM             | 7.5                                      |
| Calcium nitrate    | Ca(NO <sub>3</sub> ) <sub>2</sub> *7H <sub>2</sub> O | 1 mM                | 236                                      | 0.345 mM             | 100                                      |
| Cobalt chloride    | CoCl <sub>2</sub> *6H <sub>2</sub> O                 | -                   | -                                        | 2.1 µM               | 0.5                                      |
| Copper sulphate    | CuSO <sub>4</sub> *5H <sub>2</sub> O                 | -                   | -                                        | 8 µM                 | 2                                        |
| EDTA Iron sodium   | FeNaEDTA                                             | 25 µM               | 9.2                                      | -                    | -                                        |
| EDTA Sodium        | Na <sub>2</sub> EDTA*2H <sub>2</sub> O               | -                   | -                                        | 0.672 mM             | 250                                      |
| Iron sulphate      | FeSO <sub>4</sub> *7H <sub>2</sub> O                 | -                   | -                                        | 50 µM                | 13.9                                     |
| Magnesium sulphate | MgSO <sub>4</sub> *7H <sub>2</sub> O                 | 1 mM                | 246                                      | 1.02 mM              | 250                                      |

|                                      |                                                     |                   |       |                   |      |
|--------------------------------------|-----------------------------------------------------|-------------------|-------|-------------------|------|
| Manganese chloride                   | $\text{MnCl}_2 \cdot 4\text{H}_2\text{O}$           | 13 $\mu\text{M}$  | 2.57  | 55 $\mu\text{M}$  | 10.9 |
| Potassium<br>dihydrogen<br>phosphate | $\text{KH}_2\text{PO}_4$                            | 150 $\mu\text{M}$ | 20.4  | -                 | -    |
| Di-Potassium<br>hydrogen phosphate   | $\text{K}_2\text{HPO}_4$                            | -                 | -     | 1.15 mM           | 200  |
| Potassium nitrate                    | $\text{KNO}_3$                                      | 8 mM              | 809   | -                 | -    |
| Sodium molybdate                     | $\text{Na}_2\text{MoO}_4 \cdot 2\text{H}_2\text{O}$ | 0.4 $\mu\text{M}$ | 0.097 | 57 $\mu\text{M}$  | 12.5 |
| Zinc sulphate                        | $\text{ZnSO}_4 \cdot 7\text{H}_2\text{O}$           | -                 | -     | 113 $\mu\text{M}$ | 32.5 |
